# Supplementary material for: Link creation and information spreading over social and communication ties in an interest-based online social network
Source: Springer Nature journal article supplement (doi:10.1140/epjds12), 2012-12-01

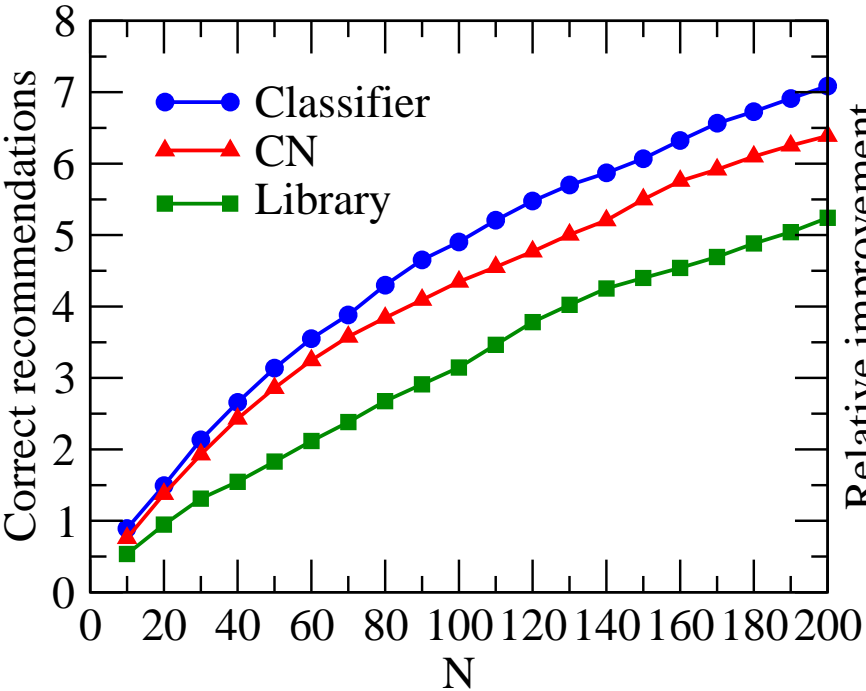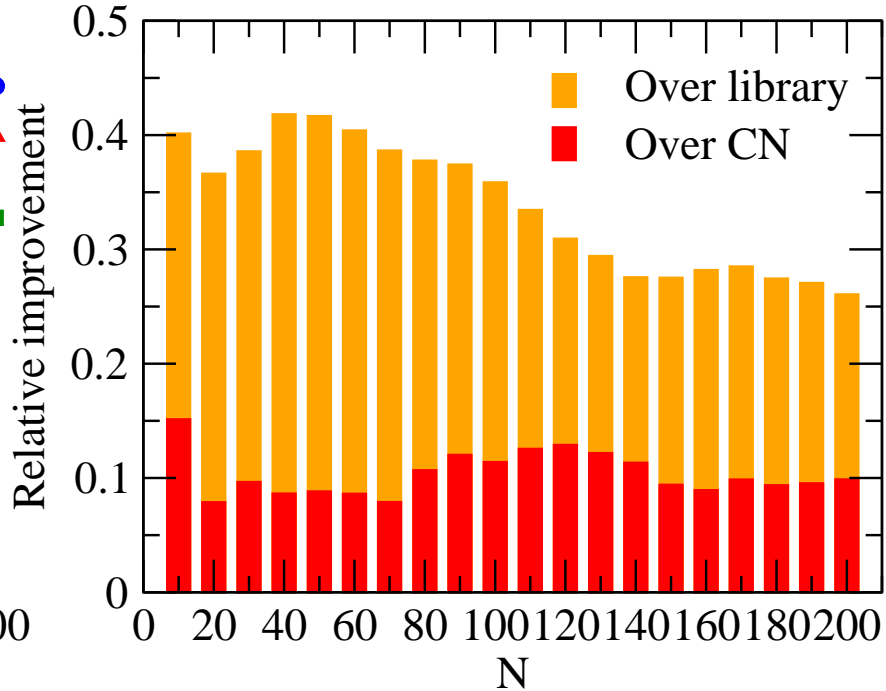

Supplement: 13688_2012_12_MOESM18_ESM.pdf [file 13688_2012_12_MOESM18_ESM.pdf]
